# Supplementary material
Source: MDPI journal article supplement (https://www.mdpi.com/2227-7099/12/1/10)
Supplement: s1 [file s1]

# The Dynamics of Fund Absorption: Evaluating the Efficacy of EU Structural Funds in Mitigating Regional Inequalities—Calabrian Case

Guzmán A. Muñoz-Fernández <sup>1,\*</sup>, Angela Bertucci <sup>1</sup>, José E. Ramos-Ruiz <sup>2</sup> and Maria Luisa Garo <sup>3</sup>

<sup>1</sup> Department of Business Organization, Faculty of Law, Economics and Business Studies, University of Cordoba, 14071 Cordoba, Spain; angebertucci@gmail.com

<sup>2</sup> Department of Applied Economics, Faculty of Law, Economics and Business Studies, University of Cordoba, 14071 Cordoba, Spain; d22raruj@uco.es

<sup>3</sup> Independent Researcher, 89900 Vibo Valentia, Italy; marilu.garo@gmail.com

\* Correspondence: guzman.munoz@uco.es

**Table S1.** Questionnaire variables.

| English Version                                                                      | Responses                                                               |
|--------------------------------------------------------------------------------------|-------------------------------------------------------------------------|
| How do you perceive the quality of education received during the course?             | Low vs. High                                                            |
| How do you overall judge the acquired skill during the master?                       | Low vs. High                                                            |
| What is the importance of skills acquired during the course for job market?          | Not important vs. Important                                             |
| What was your working status at the time of master enrollment?                       | Unemployed vs. Employed                                                 |
| If you work, how do you judge your appropriate wage?                                 | Not appropriate vs. Appropriate                                         |
| If you work at the time of master enrollment, what was you type of working contract? | Temporary vs. Permanent                                                 |
| How long after the master did you find a job?                                        | Over 6 months vs. Within 6 months                                       |
| How do you perceive the presence of the regional subsidy?                            | Unusualness vs. Usefulness                                              |
| Do you work in Calabria?                                                             | No vs. Yes                                                              |
| After master's experience, do you want to return to work in Calabria?                | No vs. Yes                                                              |
| Respondent's age                                                                     | Years                                                                   |
| Respondent's gender                                                                  | Male vs. Female                                                         |
| Population density in your Calabria residence area                                   | 25,000-50,000<br>50,000-75,000<br>75,000-100,000                        |
| Respondent's disciplinary area                                                       | Health Area,<br>Scientific-technological Area<br>Humanistic-social Area |
